# Supplementary material
Source: ML conference proceedings conference paper supplement (https://proceedings.mlr.press/v119/gao20a.html)
Supplement: Supplementary file [file gao20a-supp.pdf]

## Appendix: A Free-Energy Principle for Representation Learning

### A. Details of the experimental setup

**Datasets.** We use the MNIST (LeCun et al., 1998) and CIFAR-10 (Krizhevsky, 2009) datasets for these experiments. The former consists of  $28 \times 28$ -sized gray-scale images of handwritten digits (60,000 training and 10,000 validation). The latter consists of  $32 \times 32$ -sized RGB images (50,000 training and 10,000 for validation) spread across 10 classes; 4 of these classes (airplane, automobile, ship, truck) are transportation-based while the others are images of animals and birds.

**Architecture and training.** All models in our experiments consist of an encoder-decoder pair along with a classifier that takes in the latent representation as input. For experiments on MNIST, both encoder and decoder are multi-layer perceptrons with 2 fully-connected layers, the decoder uses a mean-square error loss, i.e., a Gaussian reconstruction likelihood and the classifier consists of a single fully-connected layer. For experiments on CIFAR-10, we use a residual network (He et al., 2016) with 18 layers as an encoder and a decoder with one fully-connected layer and 4 deconvolutional layers (Noh et al., 2015). The classifier network for CIFAR-10 is a single fully-connected layer. All models use ReLU non-linearities and batch-normalization (Ioffe & Szegedy, 2015). Further details of the architecture are given in Appendix A. We use Adam (Kingma & Ba, 2014) to train all models with cosine learning rate annealing.

The encoder and decoder for MNIST has 784–256–16 neurons on each layer; the encoding  $z$  is thus 16-dimensional which is the input to the decoder. The classifier has one hidden layer with 12 neurons and 10 outputs. The encoder for CIFAR-10 is a 18-layer residual neural network (ResNet-18) and the decoder has 4 deconvolutional layers. We used a slightly larger network for the geodesic transfer learning experiment on MNIST. The encoder and decoder have 784–400–64 neurons in each layer with a dropout of probability 0.1 after the hidden layer. The classifier has a single layer that takes the 64-dimensional encoding and predicts 10 classes.

### B. Proof of Lemma 3

The second statement directly follows by observing that  $F$  is a minimum of affine functions in  $(\lambda, \gamma)$ . To see the first, evaluate the Hessian of  $R$  and  $F$

$$\text{Hess}(R) \text{ Hess}(F) = \begin{pmatrix} \frac{\partial^2 R}{\partial D^2} & \frac{\partial^2 R}{\partial D \partial C} \\ \frac{\partial^2 R}{\partial C \partial D} & \frac{\partial^2 R}{\partial C^2} \end{pmatrix} \begin{pmatrix} \frac{\partial^2 F}{\partial \lambda^2} & \frac{\partial^2 F}{\partial \lambda \partial \gamma} \\ \frac{\partial^2 F}{\partial \gamma \partial \lambda} & \frac{\partial^2 F}{\partial \gamma^2} \end{pmatrix}$$

Since we have  $F = \min_{e_\theta(z|x), d_\theta(x|z), m_\theta(z)} R + \lambda D + \gamma C$ , we obtain

$$\lambda = -\frac{\partial R}{\partial D}, \quad \gamma = -\frac{\partial R}{\partial C}, \quad D = \frac{\partial F}{\partial \lambda}, \quad C = \frac{\partial F}{\partial \gamma}.$$

We then have

$$\begin{aligned} d\lambda &= -d\left(\frac{\partial R}{\partial D}\right) = -\frac{\partial^2 R}{\partial D^2} dD - \frac{\partial^2 R}{\partial D \partial C} dC \\ &= -\frac{\partial^2 R}{\partial D^2} \left(\frac{\partial D}{\partial \lambda} d\lambda + \frac{\partial D}{\partial \gamma} d\gamma\right) - \frac{\partial^2 R}{\partial D \partial C} \left(\frac{\partial C}{\partial \lambda} d\lambda + \frac{\partial C}{\partial \gamma} d\gamma\right) \\ &= -\left(\frac{\partial^2 R}{\partial D^2} \frac{\partial^2 F}{\partial \lambda^2} + \frac{\partial^2 R}{\partial D \partial C} \frac{\partial^2 F}{\partial \gamma \partial \lambda}\right) d\lambda - \left(\frac{\partial^2 R}{\partial D^2} \frac{\partial^2 F}{\partial \lambda \partial \gamma} + \frac{\partial^2 R}{\partial D \partial C} \frac{\partial^2 F}{\partial \gamma^2}\right) d\gamma; \end{aligned}$$

$$\begin{aligned}
 d\gamma &= -d\left(\frac{\partial R}{\partial C}\right) = -\frac{\partial^2 R}{\partial C \partial D} dD - \frac{\partial^2 R}{\partial C^2} dC \\
 &= -\frac{\partial^2 R}{\partial C \partial D} \left(\frac{\partial D}{\partial \lambda} d\lambda + \frac{\partial D}{\partial \gamma} d\gamma\right) - \frac{\partial^2 R}{\partial C^2} \left(\frac{\partial C}{\partial \lambda} d\lambda + \frac{\partial C}{\partial \gamma} d\gamma\right) \\
 &= -\left(\frac{\partial^2 R}{\partial C \partial D} \frac{\partial^2 F}{\partial \lambda^2} + \frac{\partial^2 R}{\partial C^2} \frac{\partial^2 F}{\partial \gamma \partial \lambda}\right) d\lambda - \left(\frac{\partial^2 R}{\partial C \partial D} \frac{\partial^2 F}{\partial \lambda \partial \gamma} + \frac{\partial^2 R}{\partial C^2} \frac{\partial^2 F}{\partial \gamma^2}\right) d\gamma.
 \end{aligned}$$

Compare the coefficients on both sides to get

$$\begin{aligned}
 \frac{\partial^2 R}{\partial D^2} \frac{\partial^2 F}{\partial \lambda^2} + \frac{\partial^2 R}{\partial D \partial C} \frac{\partial^2 F}{\partial \gamma \partial \lambda} &= \frac{\partial^2 R}{\partial C \partial D} \frac{\partial^2 F}{\partial \lambda \partial \gamma} + \frac{\partial^2 R}{\partial C^2} \frac{\partial^2 F}{\partial \gamma^2} = -1; \\
 \frac{\partial^2 R}{\partial D^2} \frac{\partial^2 F}{\partial \lambda \partial \gamma} + \frac{\partial^2 R}{\partial D \partial C} \frac{\partial^2 F}{\partial \gamma^2} &= \frac{\partial^2 R}{\partial C \partial D} \frac{\partial^2 F}{\partial \lambda^2} + \frac{\partial^2 R}{\partial C^2} \frac{\partial^2 F}{\partial \gamma \partial \lambda} = 0,
 \end{aligned}$$

therefore

$$\text{Hess}(R) \text{Hess}(F) = -I.$$

Since  $0 \succ \text{Hess}(F)$ , we have that  $\text{Hess}(R) \succ 0$ , then the constraint surface  $f(R, D, C) = 0$  is convex.

### C. Proof of Lemma 5

Recall the definition of the objective function (14), first we compute the gradient of the objective function as following:

$$\begin{aligned}
 \nabla_{\theta} J(\theta, \lambda, \gamma) &= -\mathbb{E}_{x \sim p(x)} \nabla_{\theta} \log Z_{\theta, x} \\
 &= -\mathbb{E}_{x \sim p(x)} \frac{1}{Z_{\theta, x}} \nabla_{\theta} Z_{\theta, x} \\
 &= -\mathbb{E}_{x \sim p(x)} \frac{1}{Z_{\theta, x}} \int (-\nabla_{\theta} H) \exp(-H) dz \\
 &= \mathbb{E}_{x \sim p(x)} \langle \nabla_{\theta} H \rangle
 \end{aligned}$$

Then with some effort of computation, we get

$$\begin{aligned}
 A = \nabla_{\theta}^2 J(\theta, \lambda, \gamma) &= \nabla_{\theta} \mathbb{E}_{x \sim p(x)} \left[ \frac{1}{Z_{\theta, x}} \int \nabla_{\theta} H \exp(-H) dz \right] \\
 &= \mathbb{E}_{x \sim p(x)} \left[ -\frac{1}{Z_{\theta, x}^2} \left( \int (-\nabla_{\theta} H) \exp(-H) dz \right) \left( \int \nabla_{\theta}^T H \exp(-H) dz \right) + \frac{1}{Z_{\theta, x}} \int \nabla_{\theta}^2 H \exp(-H) dz - \frac{1}{Z_{\theta, x}} \int \nabla_{\theta} H \nabla_{\theta}^T H \exp(-H) dz \right] \\
 &= \mathbb{E}_{x \sim p(x)} \left[ \left\langle \nabla_{\theta}^2 H \right\rangle + \langle \nabla_{\theta} H \rangle \langle \nabla_{\theta} H \rangle^{\top} - \langle \nabla_{\theta} H \nabla_{\theta}^T H \rangle \right]; \\
 b_{\lambda} = -\frac{\partial}{\partial \lambda} \nabla_{\theta} J &= -\frac{\partial}{\partial \lambda} \mathbb{E}_{x \sim p(x)} \left[ \frac{1}{Z_{\theta, x}} \int \nabla_{\theta} H \exp(-H) dz \right] \\
 &= -\mathbb{E}_{x \sim p(x)} \left[ -\frac{1}{Z_{\theta, x}^2} \left( \int -\frac{\partial H}{\partial \lambda} \exp(-H) dz \right) \left( \int \nabla_{\theta} H \exp(-H) dz \right) + \frac{1}{Z_{\theta, x}} \int \frac{\partial}{\partial \lambda} \nabla_{\theta} H \exp(-H) dz - \frac{1}{Z_{\theta, x}} \int \frac{\partial H}{\partial \lambda} \nabla_{\theta} H \exp(-H) dz \right] \\
 &= -\mathbb{E}_{x \sim p(x)} \left[ \left\langle \frac{\partial \nabla_{\theta} H}{\partial \lambda} \right\rangle - \left\langle \frac{\partial H}{\partial \lambda} \nabla_{\theta} H \right\rangle + \left\langle \frac{\partial H}{\partial \lambda} \right\rangle \langle \nabla_{\theta} H \rangle \right]; \\
 b_{\gamma} = -\frac{\partial}{\partial \gamma} \nabla_{\theta} J &= -\frac{\partial}{\partial \gamma} \mathbb{E}_{x \sim p(x)} \left[ \frac{1}{Z_{\theta, x}} \int \nabla_{\theta} H \exp(-H) dz \right] \\
 &= -\mathbb{E}_{x \sim p(x)} \left[ -\frac{1}{Z_{\theta, x}^2} \left( \int -\frac{\partial H}{\partial \gamma} \exp(-H) dz \right) \left( \int \nabla_{\theta} H \exp(-H) dz \right) + \frac{1}{Z_{\theta, x}} \int \frac{\partial}{\partial \gamma} \nabla_{\theta} H \exp(-H) dz - \frac{1}{Z_{\theta, x}} \int \frac{\partial H}{\partial \gamma} \nabla_{\theta} H \exp(-H) dz \right] \\
 &= -\mathbb{E}_{x \sim p(x)} \left[ \left\langle \frac{\partial \nabla_{\theta} H}{\partial \gamma} \right\rangle - \left\langle \frac{\partial H}{\partial \gamma} \nabla_{\theta} H \right\rangle + \left\langle \frac{\partial H}{\partial \gamma} \right\rangle \langle \nabla_{\theta} H \rangle \right].
 \end{aligned}$$

According to the quasi-static constraints (16), we have

$$A\dot{\theta} - \dot{\lambda}b_\lambda - \dot{\gamma}b_\gamma = 0,$$

that implies

$$\dot{\theta} = A^{-1}b_\lambda \dot{\lambda} + A^{-1}b_\gamma \dot{\gamma} = \theta_\lambda \dot{\lambda} + \theta_\gamma \dot{\gamma}. \quad (32)$$

#### D. Computation of Iso-classification constraint

We start with computing the gradient of classification loss, clear that  $C = \mathbb{E}_{x \sim p(x)} [-\int dz e(z|x) \log c(y|z)] = -\mathbb{E}_{x \sim p(x)} \langle \ell \rangle$ , where  $\ell = \log c_\theta(y_x|z)$  is the logarithm of the classification loss, then

$$\begin{aligned} \nabla_\theta C &= -\nabla_\theta \mathbb{E}_{x \sim p(x)} \left[ \frac{1}{Z_{\theta,x}} \int \ell \exp(-H) dz \right] \\ &= -\mathbb{E}_{x \sim p(x)} \left[ -\frac{1}{Z_{\theta,x}^2} \left( \int (-\nabla_\theta H) \exp(-H) dz \right) \left( \int \ell \exp(-H) dz \right) + \frac{1}{Z_{\theta,x}} \int \nabla_\theta \ell \exp(-H) dz - \frac{1}{Z_{\theta,x}} \int \ell \nabla_\theta H \exp(-H) dz \right] \\ &= -\mathbb{E}_{x \sim p(x)} [\langle \nabla_\theta \ell \rangle + \langle \nabla_\theta H \rangle \langle \ell \rangle - \langle \ell \nabla_\theta H \rangle]; \end{aligned}$$

$$\begin{aligned} \frac{\partial}{\partial \lambda} C &= -\frac{\partial}{\partial \lambda} \mathbb{E}_{x \sim p(x)} \left[ \frac{1}{Z_{\theta,x}} \int \ell \exp(-H) dz \right] \\ &= -\mathbb{E}_{x \sim p(x)} \left[ -\frac{1}{Z_{\theta,x}^2} \left( \int -\frac{\partial H}{\partial \lambda} \exp(-H) dz \right) \left( \int \ell \exp(-H) dz \right) - \frac{1}{Z_{\theta,x}} \int \ell \frac{\partial H}{\partial \lambda} \exp(-H) dz \right] \\ &= -\mathbb{E}_{x \sim p(x)} \left[ \left\langle \frac{\partial H}{\partial \lambda} \right\rangle \langle \ell \rangle - \left\langle \ell \frac{\partial H}{\partial \lambda} \right\rangle \right]; \end{aligned}$$

$$\begin{aligned} \frac{\partial}{\partial \gamma} C &= -\frac{\partial}{\partial \gamma} \mathbb{E}_{x \sim p(x)} \left[ \frac{1}{Z_{\theta,x}} \int \ell \exp(-H) dz \right] \\ &= -\mathbb{E}_{x \sim p(x)} \left[ -\frac{1}{Z_{\theta,x}^2} \left( \int -\frac{\partial H}{\partial \gamma} \exp(-H) dz \right) \left( \int \ell \exp(-H) dz \right) - \frac{1}{Z_{\theta,x}} \int \ell \frac{\partial H}{\partial \gamma} \exp(-H) dz \right] \\ &= -\mathbb{E}_{x \sim p(x)} \left[ \left\langle \frac{\partial H}{\partial \gamma} \right\rangle \langle \ell \rangle - \left\langle \ell \frac{\partial H}{\partial \gamma} \right\rangle \right]. \end{aligned}$$

The iso-classification loss constrains together with quasi-static constrains imply that:

$$\begin{aligned} 0 &\equiv \frac{d}{dt} C \\ &= \dot{\theta}^\top \nabla_\theta C + \dot{\lambda} \frac{\partial C}{\partial \lambda} + \dot{\gamma} \frac{\partial C}{\partial \gamma} \\ &= \dot{\lambda} \left( \theta_\lambda^\top \nabla_\theta C + \frac{\partial C}{\partial \lambda} \right) + \dot{\gamma} \left( \theta_\gamma^\top \nabla_\theta C + \frac{\partial C}{\partial \gamma} \right) \\ &= -\dot{\lambda} \mathbb{E}_{x \sim p(x)} \left[ \left\langle \frac{\partial H}{\partial \lambda} \right\rangle \langle \ell \rangle - \left\langle \ell \frac{\partial H}{\partial \lambda} \right\rangle + \langle \theta_\lambda^\top \nabla_\theta H \rangle \langle \ell \rangle - \langle \ell \theta_\lambda^\top \nabla_\theta H \rangle + \langle \theta_\lambda^\top \nabla_\theta \ell \rangle \right] - \dot{\gamma} \mathbb{E}_{x \sim p(x)} \left[ \left\langle \frac{\partial H}{\partial \gamma} \right\rangle \langle \ell \rangle - \left\langle \ell \frac{\partial H}{\partial \gamma} \right\rangle + \langle \theta_\gamma^\top \nabla_\theta H \rangle \langle \ell \rangle - \langle \ell \theta_\gamma^\top \nabla_\theta H \rangle + \langle \theta_\gamma^\top \nabla_\theta \ell \rangle \right] \\ &= C_\lambda \dot{\lambda} + C_\gamma \dot{\gamma}, \end{aligned}$$

where the third equation is followed by the equilibrium dynamics (17) for parameters  $\theta$ . So far we developed the constrained dynamics for iso-classification process:

$$\begin{aligned} 0 &= C_\lambda \dot{\lambda} + C_\gamma \dot{\gamma} \\ \dot{\theta} &= \theta_\lambda \dot{\lambda} + \theta_\gamma \dot{\gamma}. \end{aligned} \quad (33)$$

## E. Iso-classification equations for changing data distribution

In this section we analyze the dynamics for iso-classification loss process when the data distribution evolves with time.  $\frac{\partial p(x)}{\partial t}$  will lead to additional terms that represent the partial derivatives with respect to  $t$  on both the quasi-static and iso-classification constrains. More precisely, the new terms are

$$b_t = -\frac{\partial}{\partial t} \nabla_{\theta} J = -\int \frac{\partial p(x)}{\partial t} \langle \nabla_{\theta} H \rangle dx;$$

$$\frac{\partial}{\partial t} C = -\int \frac{\partial p(x)}{\partial t} \langle \ell \rangle dx,$$

then the quasi-static and iso-classification constraints are ready to be modified as

$$0 \equiv \frac{d}{dt} \nabla_{\theta} J(\theta, \lambda, \gamma) \iff 0 = \nabla_{\theta}^2 F \dot{\theta} + \dot{\lambda} \frac{\partial \nabla_{\theta} F}{\partial \lambda} + \dot{\gamma} \frac{\partial \nabla_{\theta} F}{\partial \gamma} + \frac{\partial \nabla_{\theta} F}{\partial t}$$

$$\iff \dot{\theta} = \dot{\lambda} A^{-1} b_{\lambda} + \dot{\gamma} A^{-1} b_{\gamma} + A^{-1} b_t$$

$$\iff \dot{\theta} = \dot{\lambda} \theta_{\lambda} + \dot{\gamma} \theta_{\gamma} + \theta_t;$$

$$0 \equiv \frac{d}{dt} C \iff 0 = \dot{\theta}^{\top} \nabla_{\theta} C + \dot{\lambda} \frac{\partial C}{\partial \lambda} + \dot{\gamma} \frac{\partial C}{\partial \gamma} + \frac{\partial C}{\partial t}$$

$$\iff 0 = \dot{\lambda} \left( \theta_{\lambda}^{\top} \nabla_{\theta} C + \frac{\partial C}{\partial \lambda} \right) + \dot{\gamma} \left( \theta_{\gamma}^{\top} \nabla_{\theta} C + \frac{\partial C}{\partial \gamma} \right) + \left( \theta_t^{\top} \nabla_{\theta} C + \frac{\partial C}{\partial t} \right)$$

$$\iff 0 = \dot{\lambda} C_{\lambda} + \dot{\gamma} C_{\gamma} + C_t,$$

where  $A$ ,  $b_{\lambda}$ ,  $b_{\gamma}$ ,  $C_{\lambda}$  and  $C_{\gamma}$  where  $C_{\lambda}$  and  $C_{\gamma}$  are as given in lemma 5 and (21) with the only change being that the outer expectation is taken with respect to  $x \sim p(x, t)$ . The new terms that depends on time  $t$  are

$$C_t = -\int \frac{\partial p(x, t)}{\partial t} \langle \ell \rangle dx - \mathbb{E}_{x \sim p(x, t)} \left[ \langle \theta_t^{\top} \nabla_{\theta} H \rangle \langle \ell \rangle - \langle \theta_t^{\top} \nabla_{\theta} H \ell \rangle + \langle \theta_t^{\top} \nabla_{\theta} \ell \rangle \right] \quad (34)$$

with  $\ell = \log c_{\theta}(y_{x_t}|z)$ . We can combine modified quasi-static and iso-classification constraints to get

$$\dot{\theta} = \left( \theta_{\lambda} - \frac{C_{\lambda}}{C_{\gamma}} \theta_{\gamma} \right) \dot{\lambda} + \left( \theta_t - \frac{C_t}{C_{\gamma}} \theta_{\gamma} \right).$$

$$=: \hat{\theta}_{\lambda} \dot{\lambda} + \hat{\theta}_t \quad (35)$$

This indicates that  $\theta = \theta(\lambda, t)$  is a surface parameterized by  $\lambda$  and  $t$ , equipped with a basis of tangent plane  $(\hat{\theta}_{\lambda}, \hat{\theta}_t)$ .

## F. Optimally transporting the data distribution

We first give a brief description of the theory of optimal transportation. The optimal transport map between the source task and the target task will be used to define a dynamical process for the task. We only compute the transport for the inputs  $x$  between the source and target distributions and use a heuristic to obtain the transport for the labels  $y$ . This choice is made only to simplify the exposition; it is straightforward to handle the case of transport on the joint distribution  $p(x, y)$ .

If i.i.d samples from the source task are denoted by  $\{x_1^s, \dots, x_{n_s}^s\}$  and those of the target distribution are  $\{x_1^t, \dots, x_{n_t}^t\}$  the empirical source and target distributions can be written as

$$p^s(x) = \frac{1}{n_s} \sum_{i=1}^{n_s} \delta_{x-x_i^s}, \text{ and } p^t(x) = \frac{1}{n_t} \sum_{i=1}^{n_t} \delta_{x-x_i^t}$$

respectively; here  $\delta_{x-x'}$  is a Dirac delta distribution at  $x'$ . Since the empirical data distribution is a sum of a finite number of Dirac measures, this is a discrete optimal transport problem and easy to solve. We can use the Kantorovich relaxation to denote by  $\mathcal{B}$  the set of probabilistic couplings between the two distributions:

$$\mathcal{B} = \left\{ \Gamma \in \mathbb{R}_+^{n_s \times n_t} : \Gamma \mathbf{1}_{n_s} = p, \Gamma^{\top} \mathbf{1}_{n_t} = q \right\}$$

where  $\mathbf{1}_n$  is an  $n$ -dimensional vector of ones. The Kantorovich formulation solves for

$$\Gamma^* = \operatorname{argmin}_{\Gamma \in \mathcal{B}} \sum_{i=1}^{n_s} \sum_{t=1}^{n_t} \Gamma_{ij} \kappa_{ij} \quad (36)$$

where  $\kappa \in \mathbb{R}_+^{n_s \times n_t}$  is a cost function that models transporting the datum  $x_i^s$  to  $x_j^t$ . This is the metric of the underlying data domain and one may choose any reasonable metric for  $\kappa = \|x_i^s - x_j^t\|_2^2$ . The problem in (36) is a convex optimization problem and can be solved easily; in practice we use the Sinkhorn's algorithm (Cuturi, 2013) which adds an entropic regularizer  $-h(\Gamma) = \sum_{ij} \Gamma_{ij} \log \Gamma_{ij}$  to the objective in (36).

### F.1. Changing the data distribution

Given the optimal probabilistic coupling  $\Gamma^*$  between the source and the target data distributions, we can interpolate between them at any  $t \in [0, 1]$  by following the geodesics of the Wasserstein metric

$$p(x, t) = \operatorname{argmin}_p (1-t)W_2^2(p^s, p) + tW_2^2(p, p^t).$$

For discrete optimal transport problems, as shown in Villani (2008), the interpolated distribution  $p_t$  for the metric  $\kappa_{ij} = \|x_i^s - x_j^t\|_2^2$  is given by

$$p(x, t) = \sum_{i=1}^{n_s} \sum_{j=1}^{n_t} \Gamma_{ij}^* \delta_{x - (1-t)x_i^s - tx_j^t}. \quad (37)$$

Observe that the interpolated data distribution equals the source and target distribution at  $t = 0$  and  $t = 1$  respectively and it consists of linear interpolations of the data in between.

**Remark 11 (Interpolating the labels).** The interpolation in (37) gives the marginal on the input space interpolated between the source and target tasks. To evaluate the functionals in Section 3 for the classification setting, we would also like to interpolate the labels. We do so by setting the true label of the interpolated datum  $x = (1-t)x_i^s + tx_j^t$  to be linear interpolation between the source label and the target label.

$$y(x, t) = (1-t)\delta_{y-y_{x_i^s}} + t\delta_{y-y_{x_j^t}}$$

for all  $i, j$ . Notice that the interpolated distribution  $p(x, t)$  is a sum of Dirac delta distributions weighted by the optimal coupling. We therefore only need to evaluate the labels at all the interpolated data.

**Remark 12 (Linear interpolation of data).** Our formulation of optimal transportation leads to a linear interpolation of the data in (23). This may not work well for image-based data where the square metric  $\kappa_{ij} = \|x_i^s - x - k^t\|_2^2$  may not be the appropriate metric. We note that this interpolation of data is an artifact of our choice of  $\kappa_{ij}$ , other choices for the metric also fit into the formulation and should be viable alternatives if they result in efficient computation.
